# ANESTHESIOLOGY

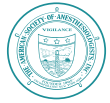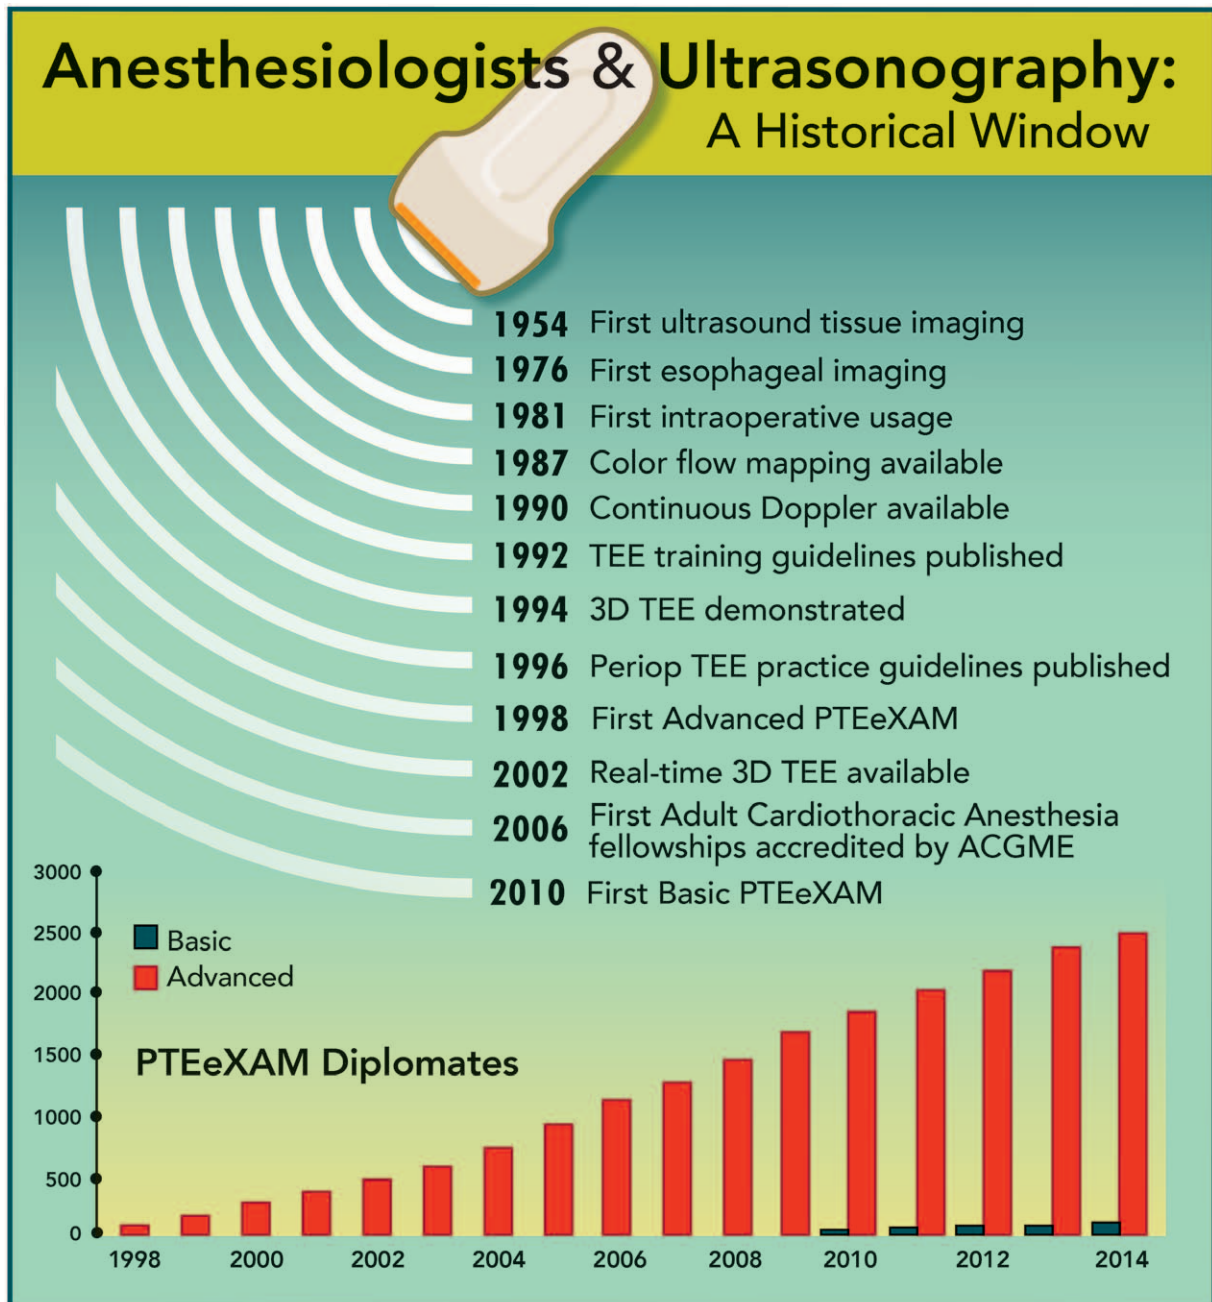

PTEeXAM data courtesy of Stanton K. Sherman, MD., National Board of Echocardiography, Raleigh, North Carolina, with historical events as previously described.<sup>1</sup> ACGME = Accreditation Council for Graduate Medical Education; PTEeXAM = perioperative transesophageal echocardiography examination; TEE = transesophageal echocardiography.

Infographic created by Jonathan P. Wanderer, Vanderbilt University School of Medicine, and James P. Rathmell, Brigham and Women's Hospital/Harvard Medical School. Illustration by Annemarie Johnson, Vivo Visuals. Dr. Wanderer is funded by the Foundation for Anesthesia Education and Research, Schaumburg, Illinois, and Anesthesia Quality Institute's Mentored Research Training Grant - Health Services Research, Schaumburg, Illinois. Address correspondence to Dr. Wanderer: jon.wanderer@vanderbilt.edu.

1. Foster E, Schiller NB: Introduction to transesophageal echocardiography (TEE) with a historical perspective. *Cardiol Clin* 2000; 18:675-9
